# Supplementary material for: Antibody response to SARS-CoV-2 mRNA vaccine in lung cancer patients: Reactivity to vaccine antigen and variants of concern
Source: bioRxiv or medRxiv preprint supplement (doi:10.1101/2022.01.03.22268599), 2022-01-23

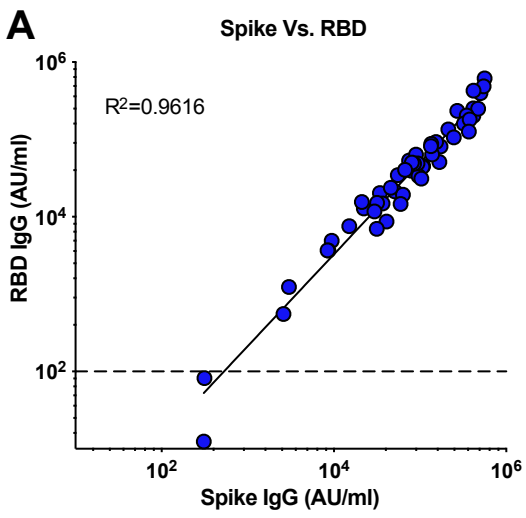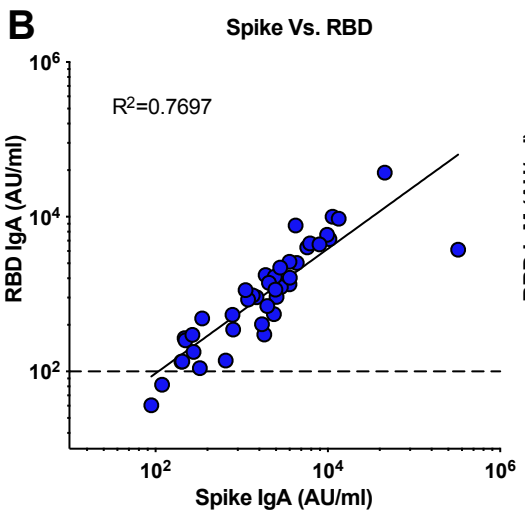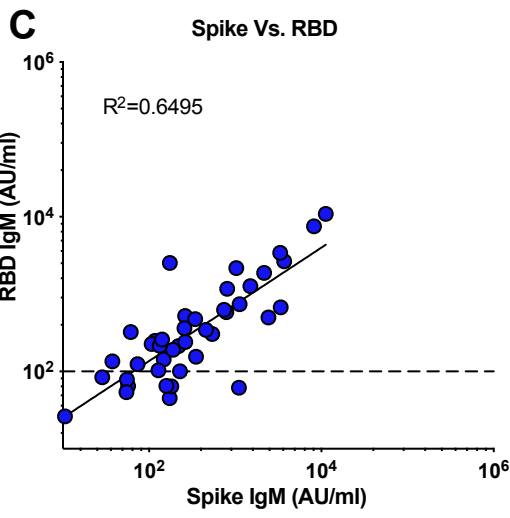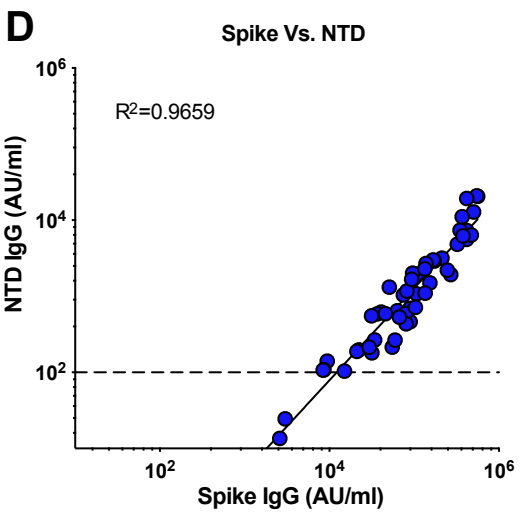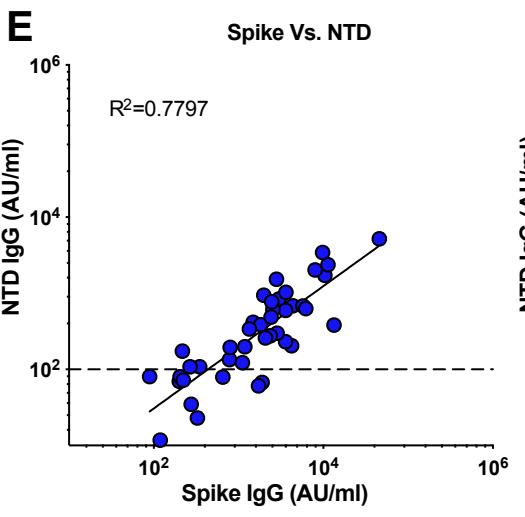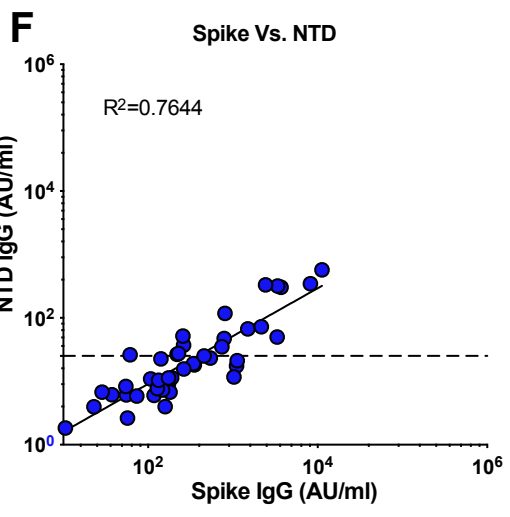

Supplement: Supplementary file [file media-1.pdf]
